# Supplementary material for: Gender Differences in the Effect of Facial Attractiveness on Perception of Time
Source: Front Psychol. 2019 Jun 4;10:1292. doi: 10.3389/fpsyg.2019.01292 (PMC6558225; doi:10.3389/fpsyg.2019.01292)
Supplement: Supplementary file 1 [file Data_Sheet_1.xlsx]

## Sheet: males' reproduced duration
ID	Age (year)	Instruction rating	social anxiety	1000-unattractive female faces	1000-unattractive male faces	1000-attractive female faces	1000-attractive male faces	1500-unattractive female faces	1500-unattractive male faces	1500-attractive female faces	1500-attractive male faces	2000-unattractive female faces	2000-unattractive male faces	2000-attractive female faces	2000-attractive male faces	2500-unattractive female faces	2500-unattractive male faces	2500-attractive female faces	2500-attractive male faces	3000-unattractive female faces	3000-unattractive male faces	3000-attractive female faces	3000-attractive male faces
1	22	8	12	1150	977.33	903	1420	1634.5	1350.67	1853.67	1784.67	2148.75	1942.5	1837	1951	2502.67	2058.25	2611.25	2359.75	2635.25	2569.75	2726.25	2787
2	20	7	9	1011.5	1035.75	816.25	834.25	1047	1203.67	1187.75	1056.75	1233.67	1273.25	1353	1069.25	1491.25	1312.33	1529.25	1579.33	1567	1254.25	1337	1667
3	21	8	12	882	1377.5	990	1352.25	1790.5	1733.25	1529.25	1771	2057	2083.25	2291.5	1956	2499.25	2318	2312.25	2494.5	2700	2770	2694	2841.75
4	20	7	5	1348.5	1116.25	1319.75	1040.67	1547.75	1391.25	1361	1615	2185.5	2098	1824.75	1734.75	2093.67	2086.33	2279.67	2494.75	2448	2471.25	2740.75	2578.25
5	19	8	18	814	800.5	909	846.75	1226.75	1206.25	1246.25	1278	1639	1626.75	1618.75	1946	2079.25	1993.25	2076.75	2185.5	2736.75	2672.75	2629	2566
6	28	9	16	878	750	815	659.5	1163.5	1074.75	1132	1328	1544.75	1484.75	1430	1521.25	1638.5	1761.25	1905.5	1713	2084.5	1963.75	2012	1824.75
7	22	8	13	1228.25	1304	1114	1553	1433.25	1502.75	1545	1471	2126.75	2094.67	1792	2260.67	2170.75	2147.67	2417.75	2002	2648.5	2464.25	2738	2753.75
8	18	8	15	569.33	617.75	683.67	529.75	796.5	821.75	888.5	995.67	1123.25	1129.33	1029	1266	995.75	1073.5	1108.5	1344.25	1499.5	1342.75	1298.25	1364.5
9	20	9	18	1387	1254.75	983.75	1219.33	1556.75	1473.75	1506.5	1546	1739.75	1845.25	1806.75	1745.75	1829.5	1994.5	1998.5	2106.75	2213.33	2526.25	2465.75	2365.67
10	21	6	14	762.5	785.5	782.5	776	829.25	866	868.25	874.25	1112.67	922.5	923.75	1001.5	1043	976.67	1140	1114.5	1132.5	1140.25	1201.75	1202.5
11	18	9	10	836.75	863	979.25	884	1441.25	1406.25	1349.75	1493.25	1859	1857.25	1918	2028.25	2543	2385.25	2149.25	2511.25	2626.75	3079.75	2980.75	2967
12	19	9	7	809.25	930	912	1027	1253.25	1318.75	1337.75	1273.5	1786.25	1594	1862.25	1776.5	2156.25	2146.5	2213.25	2358	2672.5	2950	2629.25	2564
13	21	9	6	625.25	446	644.75	663.5	853.75	746.75	834.25	713	1001.33	975	877.33	929.33	836	902	1168	1099.33	1104	1627	1222	1294
14	19	9	23	815.75	915.75	1019.25	1043.5	1429.25	980.75	886.5	1204.75	1631.5	1647.25	1757.75	1395.75	2088.25	2162.75	2386	2233.5	2274.5	2199.25	2600.25	2863.75
15	22	9	13	661.75	1141.25	896.25	696	1161.5	1010	1086.75	1504.25	1255.25	1597.75	1683.25	1680	1763	1749	1628.5	1731.75	2011.25	1963	2028.75	2256.5
16	20	8	18	746.75	715	1003	746.5	1335	990.5	1370.5	1279	1780.25	2155	2083.75	1864	2440	2276.75	2322	2538.25	2658	2798	2750.25	2899
17	18	9	19	849	752.5	895.25	974.75	1341.25	1486.75	1491.25	1321.25	1903.75	1835.25	2151.75	1868	2345.5	2503.5	2417.75	2360.75	2419.75	2611	2636	2706.75
18	20	9	16	1133.25	1093.75	1484.75	1136.5	1612	1853.5	1896.25	1832	2122.5	2136.25	2099.75	2166.5	2770	2915	2828	2595	2754.25	2980.33	2943.33	3149.25
19	28	9	17	1229	1042.75	1269.5	1194.5	1306.75	1434.75	1904.5	1627.5	1753	1626	1899.75	2365.25	2000.5	1995.75	2283.5	2571	2296.25	2389.5	3010	2603.33
20	25	8	15	531	487	1094.5	559.5	865	1084.67	1232.33	1394.75	962.75	1153.5	1274.75	1202.75	1005.5	1564.75	1621.75	1441.5	1430.5	1532.5	1724.25	1765.25

## Sheet: males' attractiveness rating
ID	AVG of attractive female	AVG of attractive male	AVG of unattractive female	AVG of unattractive male
1	8.75	8.75	2	1.75
2	8	7.25	2.75	3
3	7.25	8.5	3	2.75
4	8.25	7.75	3.25	2.5
5	7.75	7.75	2.25	2.25
6	7.75	7.25	2.75	2.25
7	8.75	6.5	2.5	3.25
8	7.75	8	2.25	2
9	7	6.5	3.25	2.25
10	7.5	7	3.75	3.25
11	7.5	7.5	1.25	2
12	6.75	7.5	2.75	2.75
13	7.25	7.5	2.5	2.75
14	8	6.5	1.5	3
15	7.25	8.25	2	2
16	7.25	7.25	1.25	2.25
17	7.5	7.75	1.75	3.25
18	7.5	8	2.75	2
19	7.75	8	3.25	3
20	7.75	7.5	2.25	2.25

## Sheet: males' distinctiveness rating
ID	AVG of attractive female	AVG of attractive male	AVG of unattractive female	AVG of unattractive male
1	5	5.5	5.5	5.75
2	5.5	6.25	5.75	5.5
3	4.75	6.25	5.75	5.5
4	6.5	4.25	5.75	5
5	5.5	5.75	4.75	6.25
6	6.5	6.25	5.75	6.25
7	5.5	6	5.25	5.75
8	5	5.25	4.75	4.75
9	4.5	5	5.5	5.25
10	4.25	5.75	6.5	5.75
11	6.5	5.5	5.25	6.25
12	5.5	5.75	5.5	4.75
13	5.75	6	5.25	5.75
14	5.5	6	5.75	5.5
15	6.5	6.5	5.75	6
16	5.75	4.75	5	5.5
17	6.5	6	5.25	5.25
18	5	4.75	6	6
19	5.75	4.75	5.75	5.25
20	5	5.25	5.75	6.5

## Sheet: females' reproduced duration
ID	Age (year)	Instruction rating	social anxiety	1000-unattractive female faces	1000-unattractive male faces	1000-attractive female faces	1000-attractive male faces	1500-unattractive female faces	1500-unattractive male faces	1500-attractive female faces	1500-attractive male faces	2000-unattractive female faces	2000-unattractive male faces	2000-attractive female faces	2000-attractive male faces	2500-unattractive female faces	2500-unattractive male faces	2500-attractive female faces	2500-attractive male faces	3000-unattractive female faces	3000-unattractive male faces	3000-attractive female faces	3000-attractive male faces
1	22	8	23	1150	977.33	903	1420	1634.5	1350.67	1853.67	1784.67	2148.75	1942.5	1837	1951	2502.67	2058.25	2611.25	2359.75	2635.25	2569.75	2726.25	2787
2	20	7	20	1011.5	1035.75	816.25	834.25	1047	1203.67	1187.75	1056.75	1233.67	1273.25	1353	1069.25	1491.25	1312.33	1529.25	1579.33	1567	1254.25	1337	1667
3	21	8	9	882	1377.5	990	1352.25	1790.5	1733.25	1529.25	1771	2057	2083.25	2291.5	1956	2499.25	2318	2312.25	2494.5	2700	2770	2694	2841.75
4	20	7	9	1348.5	1116.25	1319.75	1040.67	1547.75	1391.25	1361	1615	2185.5	2098	1824.75	1734.75	2093.67	2086.33	2279.67	2494.75	2448	2471.25	2740.75	2578.25
5	19	8	19	814	800.5	909	846.75	1226.75	1206.25	1246.25	1278	1639	1626.75	1618.75	1946	2079.25	1993.25	2076.75	2185.5	2736.75	2672.75	2629	2566
6	28	9	13	878	750	815	659.5	1163.5	1074.75	1132	1328	1544.75	1484.75	1430	1521.25	1638.5	1761.25	1905.5	1713	2084.5	1963.75	2012	1824.75
7	22	8	10	1228.25	1304	1114	1553	1433.25	1502.75	1545	1471	2126.75	2094.67	1792	2260.67	2170.75	2147.67	2417.75	2002	2648.5	2464.25	2738	2753.75
8	18	8	12	569.33	617.75	683.67	529.75	796.5	821.75	888.5	995.67	1123.25	1129.33	1029	1266	995.75	1073.5	1108.5	1344.25	1499.5	1342.75	1298.25	1364.5
9	20	9	16	1387	1254.75	983.75	1219.33	1556.75	1473.75	1506.5	1546	1739.75	1845.25	1806.75	1745.75	1829.5	1994.5	1998.5	2106.75	2213.33	2526.25	2465.75	2365.67
10	21	6	18	762.5	785.5	782.5	776	829.25	866	868.25	874.25	1112.67	922.5	923.75	1001.5	1043	976.67	1140	1114.5	1132.5	1140.25	1201.75	1202.5
11	18	9	18	836.75	863	979.25	884	1441.25	1406.25	1349.75	1493.25	1859	1857.25	1918	2028.25	2543	2385.25	2149.25	2511.25	2626.75	3079.75	2980.75	2967
12	19	9	19	809.25	930	912	1027	1253.25	1318.75	1337.75	1273.5	1786.25	1594	1862.25	1776.5	2156.25	2146.5	2213.25	2358	2672.5	2950	2629.25	2564
13	21	9	8	625.25	446	644.75	663.5	853.75	746.75	834.25	713	1001.33	975	877.33	929.33	836	902	1168	1099.33	1104	1627	1222	1294
14	19	9	27	815.75	915.75	1019.25	1043.5	1429.25	980.75	886.5	1204.75	1631.5	1647.25	1757.75	1395.75	2088.25	2162.75	2386	2233.5	2274.5	2199.25	2600.25	2863.75
15	22	9	8	661.75	1141.25	896.25	696	1161.5	1010	1086.75	1504.25	1255.25	1597.75	1683.25	1680	1763	1749	1628.5	1731.75	2011.25	1963	2028.75	2256.5
16	20	8	15	746.75	715	1003	746.5	1335	990.5	1370.5	1279	1780.25	2155	2083.75	1864	2440	2276.75	2322	2538.25	2658	2798	2750.25	2899
17	18	9	16	849	752.5	895.25	974.75	1341.25	1486.75	1491.25	1321.25	1903.75	1835.25	2151.75	1868	2345.5	2503.5	2417.75	2360.75	2419.75	2611	2636	2706.75
18	20	9	13	1133.25	1093.75	1484.75	1136.5	1612	1853.5	1896.25	1832	2122.5	2136.25	2099.75	2166.5	2770	2915	2828	2595	2754.25	2980.33	2943.33	3149.25
19	28	9	18	1229	1042.75	1269.5	1194.5	1306.75	1434.75	1904.5	1627.5	1753	1626	1899.75	2365.25	2000.5	1995.75	2283.5	2571	2296.25	2389.5	3010	2603.33
20	25	8	12	531	487	1094.5	559.5	865	1084.67	1232.33	1394.75	962.75	1153.5	1274.75	1202.75	1005.5	1564.75	1621.75	1441.5	1430.5	1532.5	1724.25	1765.25

## Sheet: females' attractiveness rating
ID	AVG of attractive female	AVG of attractive male	AVG of unattractive female	AVG of unattractive male
1	8	8	2	1.75
2	7.75	8.5	1.25	2
3	8.75	7.5	2	2.25
4	7	8.25	2	2.5
5	8	7.75	1.75	2
6	8	8.25	1.75	2
7	8	8	2.5	3
8	7.25	8.75	3	1.75
9	6.75	7.75	3.5	2.5
10	8.25	8	3.25	2.5
11	7.75	7.25	3.5	2.5
12	8	7.75	3.25	2.5
13	7.5	7.5	2.75	3.5
14	7.75	8	2.75	3.25
15	7.75	7.75	3	3
16	7	8	2.5	4
17	6.75	6.75	3.5	2.5
18	7.75	7.5	3.5	2.5
19	7.75	7.75	2.5	2.75
20	7.75	8.5	2.5	2.75

## Sheet: females' distinctiveness rating
ID	AVG of attractive female	AVG of attractive male	AVG of unattractive female	AVG of unattractive male
1	5	5.5	3.75	4.25
2	5.75	5	4.25	3.75
3	4.5	5	4.5	4.5
4	4.5	4.75	4.75	4.25
5	4.5	6	5.25	5
6	5.5	4.75	5.25	4.75
7	5	5.5	4.25	5.5
8	4.25	4.5	6.25	5
9	4.5	4.75	3.75	5.75
10	5.5	5	4.75	5
11	4.5	4.5	5.25	5.5
12	4.25	4	4	5.25
13	4.75	4.25	4.75	4
14	4.25	5	3.5	4.75
15	5.5	4.5	4.5	5
16	3.5	4.5	4.5	3.75
17	3.5	4.5	5.75	4.5
18	4.25	4.5	3.75	5.25
19	4.25	4.25	6.25	3.25
20	5.5	4.75	4.75	4.5
