# Supplementary material for: Gender Differences in the Effect of Facial Attractiveness on Perception of Time
Source: Front Psychol. 2019 Jun 4;10:1292. doi: 10.3389/fpsyg.2019.01292 (PMC6558225; doi:10.3389/fpsyg.2019.01292)
Supplement: Supplementary file 2 [file Data_Sheet_2.xlsx]

## Sheet: males' reproduced duration
ID	Age (year)	Instruction rating	social anxiety	attractive male1000	attractive male1500	attractive male2000	attractive male2500	attractive male3000	attractive female1000	attractive female1500	attractive female2000	attractive female2500	attractive female3000	unattractive male1000	unattractive male1500	unattractive male2000	unattractive male2500	unattractive male3000	unattractive female1000	unattractive female1500	unattractive female2000	unattractive female2500	unattractive female3000
1	19	8	11	884	1022.5	1285.75	1594.25	1874.5	793.75	905.25	1283.75	1446	1684.25	755.5	918.25	1164.75	1502.33	1817	658	861	1076.25	1218.75	1587.75
2	21	9	11	656.25	896.5	1955.75	2434	2809.25	824	1035.33	1576.25	2232.75	2490.25	740.5	1139.75	1892.5	1855	2383.33	648	945.75	1591	2007	2504
3	20	8	13	714.25	1181	1556.5	2017.5	2855	862	1232.75	1712	2315.25	2803.25	760.5	1053.67	1686.75	2173.5	2377.5	809.5	1090	1711.5	2419	2626
4	19	9	18	860.5	1477.25	2069.75	2515.5	2886.75	1284.25	1884.5	2392	2411.5	2842.25	867.25	1430	2021.5	2384.75	2788	982.75	1708	2157	2356.25	2803.5
5	19	8	27	785.25	1106	1626.5	1947.5	2342.25	930	1518.25	1881.75	1996.5	2567.5	1023.25	1243	1495	1929	2093.75	895.25	1566.25	1664.5	2106.25	2637.75
6	23	9	9	737.75	906	1767.25	1869.5	2229.5	877.25	932	1503	1811.25	2045	795.75	893.25	1433.5	1971.75	2233	738	1066.75	1694	1904	2099
7	19	7	10	1150.75	1430.5	1782.25	2208.5	2469	959.5	1622.25	2021.25	2218.5	2403.25	1035	1526.5	1699.5	2181	2474.75	1037.5	1646	1770.5	2109	2447.75
8	21	9	12	946.75	1470.5	1800.75	2347.5	2762	854.75	1496	2015	2203.5	2420.75	951.5	1325.25	1752.25	2340.5	2944	786.333	1321.75	1639.75	2003.25	2056
9	20	8	13	879.5	1495	1977.75	2368	2505.25	968.25	1444.75	1730.5	2377.75	2776.25	1041.75	1344	1966	1996.75	2473.5	861.25	1433	1858.75	2307.75	2674
10	22	7	8	757.5	1285	1106.25	1970.5	2377	891.25	1187.25	1494.75	1975	2313	178	1050	1512.25	1951.5	2129	659	1142	1481	1836	2274.25
11	21	8	25	831	1106	1706	1952	2617.25	832	1109.25	1877	2111.75	2480	864.5	1077.75	1688.25	2135.75	2341	823.25	1013.75	1492.5	1963.75	2240
12	21	8	16	828.75	1163.75	1341.75	1536.5	1270.75	826.5	1056.75	1195.25	1379.5	1800	819.75	1103.5	1356.5	1343.25	1434	823.5	935.25	989.25	1291.25	1721.75
13	23	9	14	873.75	882	1423.25	1727.25	1780.25	776.25	1269.75	1513.5	1934	2266.75	777.75	952.75	1378.5	1620.25	1805.5	687.75	1176.25	1307	1803.25	1671.5
14	25	9	17	1222.75	1319	1312	1413	1963.5	1365.25	1396	1591.75	1731.25	1810	905.25	1247.5	1464.75	1443	1987.25	1022.75	1275.75	1459.5	1540.25	1188.25
15	20	9	17	645.25	798.5	1004.5	992.5	1234.25	810.5	943.5	1143.75	1231.25	1492	691.25	745.25	864.75	925	1093.5	770	841.5	927.5	1042	1213.25
16	20	7	9	828	1451.75	2048.5	2167.25	2236	921	1267.33	1643.25	2024.25	2487.5	718.333	1558.25	1970.5	2179	2389.5	937.667	1222.25	1702.33	1939.5	2474.75
17	20	8	20	886.25	1266	1949	2100.25	2516.5	934.25	1161.5	1773.25	2123.5	2499.5	942.25	1241.5	1861.5	1921.5	2747.5	482.75	1089.5	1786	2120.5	2692.25
18	20	9	19	1044.25	1474	2171.25	2510.75	2853	1592.67	1690.5	2145	2713	2819	1091.67	1456	2078.5	2490.75	2875	1071.75	1867	2128	2334.5	2871
19	22	9	14	1047	1385	1641	2304.5	2658.25	1024.25	1508	2402.25	2611.25	2972.5	961.5	1372.5	1566.75	2108.5	2717.5	1084.75	1420.25	1927.5	2604.5	3126.75
20	20	9	13	926	1333.25	1735.75	2181.67	2695.75	1000.25	1243.25	1673	2085.75	2445.75	1035.5	1187.5	1638	2126.25	2658.75	900.25	1425	1528.25	1702	2785.5

## Sheet: males' attractiveness rating
ID	AVG of attractive female	AVG of attractive male	AVG of unattractive female	AVG of unattractive male
1	7.5	7.25	3.5	3
2	7.75	7	2.5	3.25
3	6.75	7.25	3.5	3.75
4	7	6.75	2.5	2.5
5	7	6	3.75	2.75
6	7.25	7.5	2.5	2.75
7	6.25	7.5	3.5	3.5
8	8.75	7	3	2.25
9	8.25	7.5	1.25	2
10	7.5	6.75	3.25	2.25
11	8.75	7.75	3.25	1.75
12	6.75	8	2.25	2.25
13	6.5	6.25	2.75	4
14	7.5	6.5	2.5	3.25
15	8	7.5	3.5	3
16	7.5	8	2.5	1.75
17	8.25	7.75	3	2.75
18	7	7.75	2.75	2.5
19	6.75	6.75	3	3.5
20	6.75	7.5	3.25	2.25

## Sheet: males' distinctiveness rating
ID	AVG of attractive female	AVG of attractive male	AVG of unattractive female	AVG of unattractive male
1	5.5	5.75	5.25	5.5
2	3.25	3.75	4.75	4.25
3	5.25	4.5	4.75	3
4	4.75	5.5	4	4
5	5	5	4.25	5.25
6	4.25	4.25	4.25	3
7	4.25	5	3.75	5.5
8	3.75	5.25	7.25	5
9	6	5.25	4	5.5
10	3	4.25	5.75	5.75
11	4.25	4.75	5	6.75
12	5	4.5	5.75	4.5
13	4	4.75	5.25	5.25
14	5.75	4.5	4.5	4.75
15	4	4	3	6
16	4.75	3.75	4.75	3
17	5.25	5.75	4.5	6.5
18	7	3.5	6	4.5
19	5.75	5	5	5.5
20	6	4.75	3	5

## Sheet: females' reproduced duration
ID	Age (year)	Instruction rating	social anxiety	attractive male1000	attractive male1500	attractive male2000	attractive male2500	attractive male3000	attractive female1000	attractive female1500	attractive female2000	attractive female2500	attractive female3000	unattractive male1000	unattractive male1500	unattractive male2000	unattractive male2500	unattractive male3000	unattractive female1000	unattractive female1500	unattractive female2000	unattractive female2500	unattractive female3000
1	23	9	18	1007	1448.25	1448.25	1687.5	1587.75	965	1186.5	1414	1768	1641	799.5	1367	1499.5	1725	1738.75	882.5	1142.25	1457.25	1564.75	1916.75
2	19	9	8	1348.5	1537.25	1767.25	2093.75	2198.75	1200.75	1536	1542.5	1903.25	2181.5	1030.75	1279.75	1811.5	2149	2288	970.5	1559.5	1640	2069.75	1922.75
3	21	9	17	931.75	1142.5	1737.5	1935.5	2446.25	921.75	1288	1768	2158	2434	875.25	1196	1696.25	2065.5	2472.75	784.5	1258.5	1697.75	2361.25	2547.5
4	18	9	8	717.75	950	1265.25	1337.75	1779.75	629.25	1054.5	1070.75	1637.5	1805.75	594	679.75	1216.75	1448.75	1879	595.25	875.5	1247.25	1562.75	1970.75
5	20	7	16	1056	1460.5	1877.75	2442	2794.5	1033.25	1605.25	2143.25	2344.75	2735.25	1042.75	1500.5	2161.5	2422.25	2723.75	997.5	1510.25	1995.5	2370.75	2771.75
6	22	9	18	864.5	1369.75	1831.75	1833.75	2821.75	945.25	1437	1820.5	1974.75	2557	873	995.75	1633.75	1852.75	2833.75	954.5	1349.25	1578.25	2021.75	2319.25
7	25	9	16	905	1888	1613.5	2192.5	2253.5	726.75	1090.25	1746.5	2314	2803	808.75	1127.75	1660.5	1959.75	2480.75	789.25	1033	1493.5	1999.25	2643
8	21	7	19	644	1282.75	2180	2465.25	2626.75	911.5	1484.25	2041.25	2372.25	2396	684.25	1491.5	2098.5	2045.25	2537.25	1023.5	1436.75	1633.25	2220.75	2496.75
9	20	9	14	1139.5	1784.5	2011.5	2434.75	2255	1378.75	1728.75	1968.75	2159.5	2179	1303.75	1447.5	2041.75	2270.25	2333.75	1513.25	1636	1878.75	2131.25	2261.25
10	23	9	11	1063.25	1690.75	1804.75	2307.75	2715.25	974.25	1545.75	1959.5	2461.75	2689	1262.25	1359.75	1896.5	1903.5	2186	736.75	1535.75	1690.75	2192.25	2730.5
11	20	8	26	1044	1453.5	2045.25	2419.75	2411.5	759.75	1726.5	1737.5	2605.25	2903.5	994.5	1169.5	1855.5	1955	2410.75	1016.25	1523	1637.75	2142.67	2488.5
12	19	9	12	854.5	973.5	1278.5	1838.25	2131.75	666.5	1237	1105.5	1077.5	1499.5	628.75	943.5	1002.5	1028.25	1574.25	641	965.5	1041	1104.5	1168
13	21	7	15	910.75	1555.25	2135.5	2596.5	2857.75	802.25	1644.25	2171	2517.67	2999.5	963.25	1770	1997.25	2562	2909	878.75	1789	2188	2527.5	2836.75
14	20	8	9	1037.5	1668.5	1837	2013.75	2412.25	1556	1574	2484.75	1768.5	2608	1204.5	1349.5	1734.25	1744.75	2333.5	1227.25	1225.5	2301.5	1845.5	2256.5
15	22	9	11	922	1358.5	1443.25	1524.5	1680.25	1079.75	1212.5	1350.75	1203.75	1317.25	771.5	1056	1354	1585.75	1645.5	750.75	1232	1266	1233	1239.5
16	20	7	16	872	985.5	1328.75	1675.25	1958.25	751.5	972.5	1214.25	1625.5	1567	756.75	1190.5	1338.5	1536.75	1606	791.5	956.25	1424	1223.25	1681.75
17	19	8	15	987	1034	1268	1744.75	1928.75	870.25	1043.75	1323.25	1897.5	2213.25	905.75	1065.75	1544.75	1791	1674.25	644.75	1023.25	1367.25	1792	2026
18	20	9	23	1092	1528.25	1700.67	1970.75	2462.5	1271	1553	1932	1929.5	2248	1233	1576.5	1643.75	2039	2408.75	1433.75	1510	1750.75	2070.75	1744.5
19	24	8	19	931	1159	1354	1314.5	1444.67	583.75	907.25	1082.67	1011.5	1357.25	943.75	994.25	1125.25	1207.75	1244.67	592.75	887.5	923.25	828.75	1219.5
20	22	9	10	1573.25	2122.5	2151.5	2155	2782.25	1453.5	1933.75	2402.25	2341.75	2989.5	1562.75	1659.25	1967.25	2292.25	2410.25	1274	2083.75	2239.5	2426	2626.25

## Sheet: females' attractiveness rating
ID	AVG of attractive female	AVG of attractive male	AVG of unattractive female	AVG of unattractive male
1	7.75	8.25	3	3.5
2	7.5	7.75	4.25	1.75
3	7	7.25	2.5	2
4	7.25	7.5	2	3.5
5	7.5	7.25	3	3.25
6	7	7.75	3.5	2.5
7	8	7.25	2	3.25
8	7	8	2.25	1.75
9	7	8.5	3.75	3
10	7.75	8.75	2.75	2.5
11	8.25	8.5	2.5	2.25
12	7.5	8.5	2.5	3
13	7.25	7.25	2.75	3.25
14	7.75	8.75	4.5	2.5
15	8.25	8.25	2.75	3
16	7.25	6.75	2.75	2.75
17	8	7.25	2.75	2.25
18	8	6.75	2.5	2.5
19	7.75	6.25	3	1.75
20	7.5	7.25	3.5	2.25

## Sheet: females' distinctiveness rating
ID	AVG of attractive female	AVG of attractive male	AVG of unattractive female	AVG of unattractive male
1	4.75	5.25	5.5	5
2	3.25	3.75	5.5	4.75
3	4.25	5	4.75	6.25
4	4.25	4.75	5.25	4.25
5	4.75	4.5	4.5	4.25
6	3.5	4.25	4	5.5
7	4.25	5	5.5	5.5
8	3.25	4.5	6	3.75
9	7	5	3.75	3.5
10	5.25	4.5	4.5	3.5
11	5.5	4	4	4.5
12	4.5	5.5	5.25	5.5
13	4.25	4	4.5	4.25
14	5	5.25	4.5	4.5
15	5	4	4.75	5.75
16	5.5	4.75	4.75	5.75
17	4.75	5.25	4.75	6.25
18	5	4.25	5.75	4.25
19	5	4.5	4	4.25
20	5	4.5	5	6
